# Supplementary material
Source: publisher figshare collection journal article supplement (https://acs.figshare.com/ndownloader/files/5523155)
Supplement: Supplementary file 1 [file 5523155]

**Supporting Information for:**  
**Cation Dependant Carbonate Speciation and the Effect of Water**

**Greg A. Mutch<sup>1</sup>, Sara Morandi<sup>2,3</sup>, Rebecca Walker<sup>1</sup>, James A. Anderson<sup>1</sup>, David Vega-Maza<sup>1</sup>, Lorenza Operti<sup>2,3</sup>, Giuseppina Cerrato<sup>2,3\*</sup>**

<sup>1</sup> Materials and Chemical Engineering Group, School of Engineering, Fraser Noble Building, King's College, University of Aberdeen, Aberdeen, AB24 3UE (UK).

<sup>2</sup> Department of Chemistry & NIS Interdept. Centre, University of Torino, via P. Giuria, 7 – 10125 Torino (Italy).

<sup>3</sup> Consorzio INSTM, UdR Torino, via G. Giusti, 9 - 50121 Firenze (Italy).

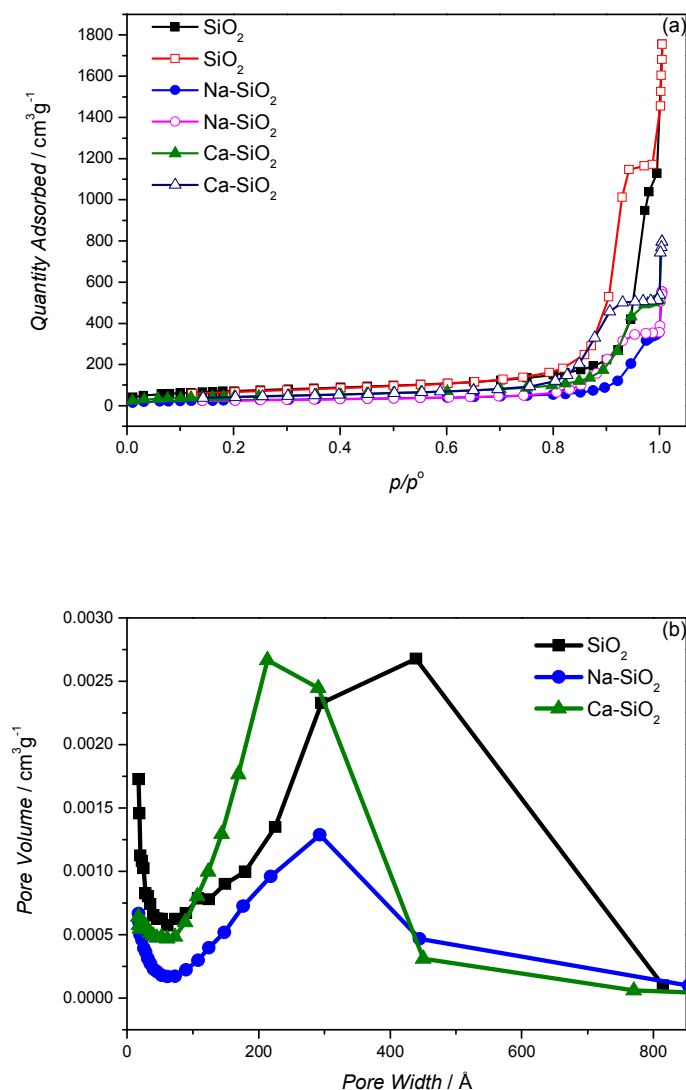

**Figure S1** - (a)  $N_2$  adsorption-desorption isotherms and (b) pore size distribution plots of  $\text{SiO}_2$ ,  $\text{Na-SiO}_2$  and  $\text{Ca-SiO}_2$  as prepared. Isotherms are of Type IV classification and exhibit H1 hysteresis loops, indicating that the parent material is mesoporous, a feature preserved following doping. A shift to smaller pore width values is evidenced upon doping, with a decrease in total pore volume more evident for  $\text{Na-SiO}_2$ .

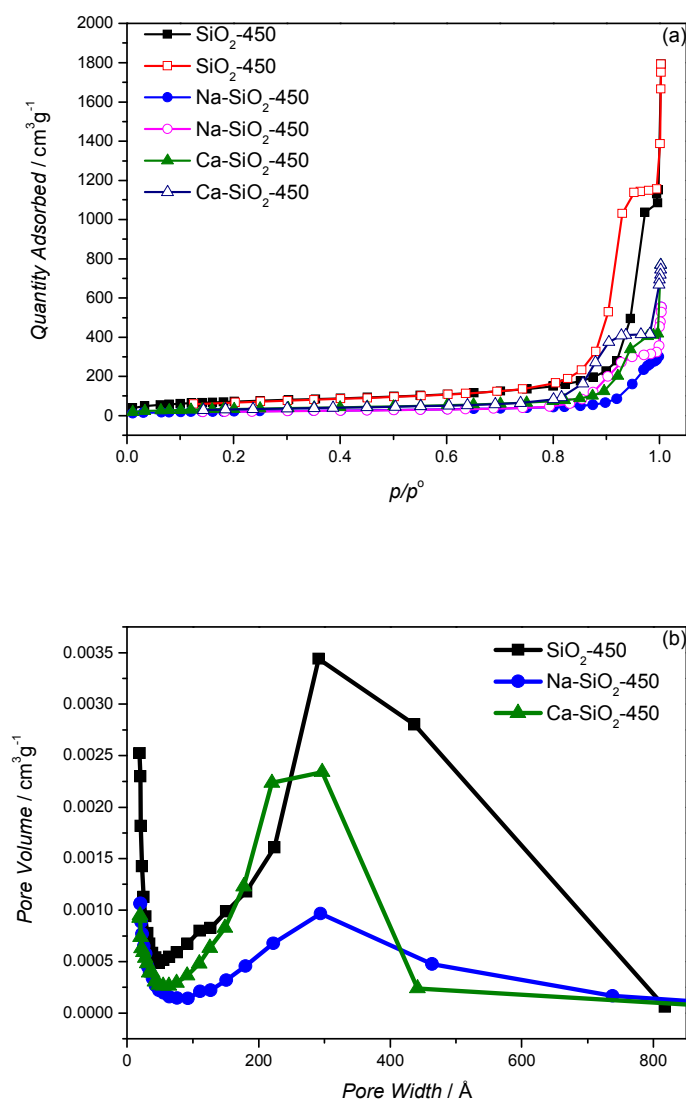

**Figure S2** - (a)  $\text{N}_2$  adsorption-desorption isotherms and (b) pore size distribution plots of  $\text{SiO}_2$ ,  $\text{Na-SiO}_2$  and  $\text{Ca-SiO}_2$  after calcination. Isotherms are of Type IV classification and exhibit H1 hysteresis loops, indicating that upon calcination the material is mesoporous. A general loss in pore volume is evidenced across a wide range of pore values as compared to Figure S1.

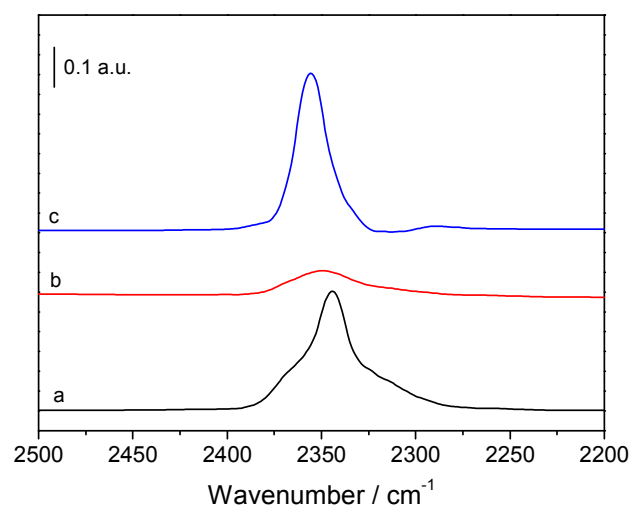

**Figure S3** – FTIR spectra in the 2500-2200 region relative to  $\nu_3$  mode of molecular (physi)sorbed  $\text{CO}_2$ . Curves a-b-c refers to plain  $\text{SiO}_2$ ,  $\text{Na-SiO}_2$  and  $\text{Ca-SiO}_2$ , respectively, after thermal treatment at 400 °C *in vacuo*.

### Calculation of surface coverage after cation-exchange

Concentration of surface hydroxyl groups taken – 4.6 and 4.9 OH nm<sup>-2</sup> for least-squares and arithmetical mean respectively.

Water treated silica surface area = 252 m<sup>2</sup> g<sup>-1</sup>

Considering the surface area and the concentration of OH groups on the surface, there will be  $1.16 \times 10^{21}$  and  $1.23 \times 10^{21}$  surface hydroxyl groups per gram of SiO<sub>2</sub>.

Considering the EDX results for Na-SiO<sub>2</sub> determining a value of 4.85 wt% Na<sup>+</sup>, this equates to  $1.27 \times 10^{21}$  atoms (2.11 mmol) of Na per gram of Na-SiO<sub>2</sub>.

Considering the EDX results for Ca-SiO<sub>2</sub> determining a value of 4.16 wt% Ca<sup>2+</sup>, this equates to  $6.25 \times 10^{20}$  atoms (1.04 mmol) of Ca per gram of Ca-SiO<sub>2</sub>.

Given the concentration of OH groups, the amount of available Na<sup>+</sup> ions and an assumption of direct exchange of one H<sup>+</sup> for each Na<sup>+</sup> it can be determined that the surface coverage is 109.6 and 102.9 % for least-squares and arithmetical mean OH concentration respectively.

Given the concentration of OH groups, the amount of available Ca<sup>2+</sup> ions and an assumption of direct exchange of two H<sup>+</sup> for each Ca<sup>2+</sup> it can be determined that the surface coverage is 107.9 and 101.2 % for least-squares and arithmetical mean OH concentration respectively.

Coverage ( $\theta$ ) is defined as the amount of adsorption sites (OH) occupied by adsorbate ions (Na/Ca), expressed as a percentage of available surface sites based on the assumed concentrations for amorphous silica above.
